# Supplementary material for: Controllable photophysical properties and self-assembly of siloxane-poly(amidoamine) dendrimers
Source: Royal Society of Chemistry journal article supplement (doi:10.1039/c5cp03658e), 2015-01-01
Supplement: c5cp03658e1.pdf [file c5cp03658e1.pdf]

## SUPPORTING INFORMATION

### Controllable Photophysical Properties and Self-Assembly of Siloxane–Poly(Amidoamine) Dendrimers

Hang Lu, and Shengyu Feng\*

Key Laboratory of Special Functional Aggregated Materials & Key Laboratory of Colloid and  
Interface Chemistry (Shandong University), Ministry of Education; School of Chemistry and  
Chemical Engineering, Shandong University, Jinan 250100, P. R. China

**Scheme S1.** Structures of Si-PAMAM

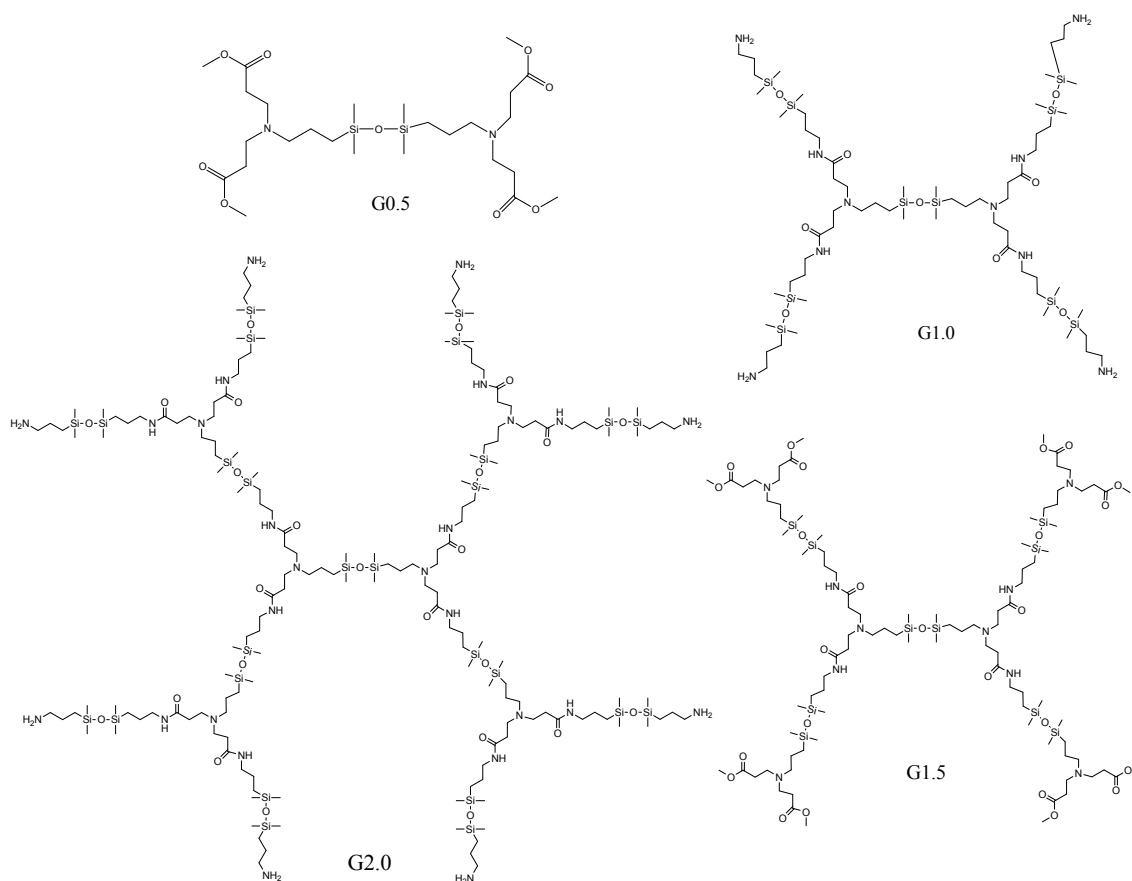

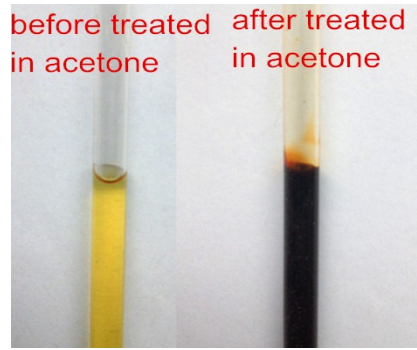

**Figure S1.** The photos of G2.0 before and after treated in acetone

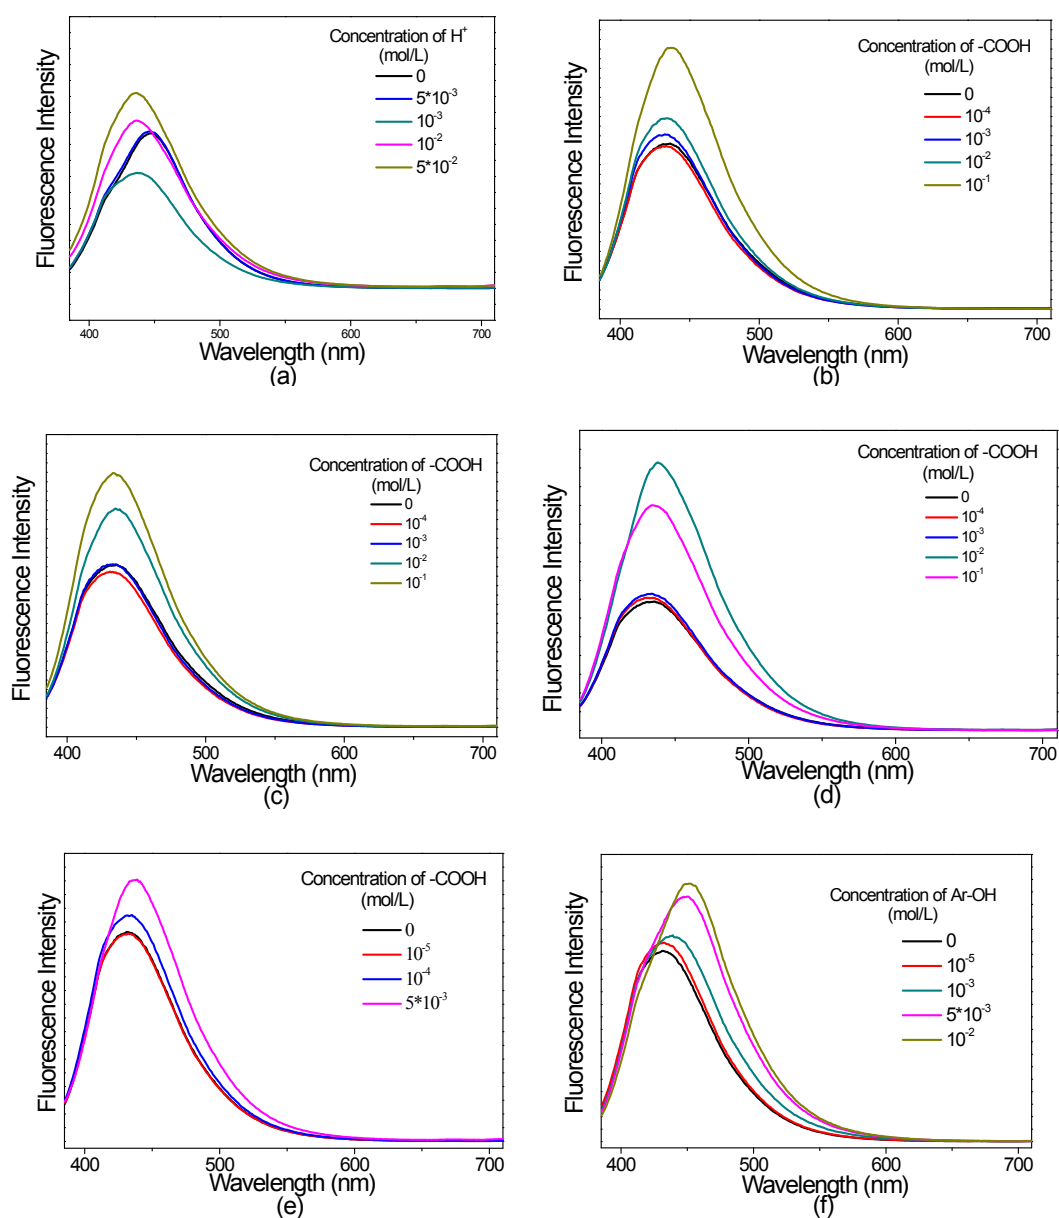

**Figure S2.** Fluorescence spectra of Si-PAMAM dendrimers (G2) solution with acids: (a) phosphoric acid, (b) HAc, (c) oxalic acid, (d) citric acid, (e) 1,2,4,5-benzenetetracarboxylic acid, (f) phloroglucinol.

**Table S1.** The quantum yield of Si-PAMAM(G2.0) in different solvents

| <b>Solvent</b>       | <b>Methanol</b> | <b>Acetone</b> | <b>THF</b> | <b>Toluene</b> | <b>CCl<sub>4</sub></b> |
|----------------------|-----------------|----------------|------------|----------------|------------------------|
| <b>Quantum Yield</b> | 0.197           | 0.098          | 0.097      | 0.061          | 0.037                  |
